# Supplementary material for: Electric field temporal interference stimulation of neurons in vitro
Source: Royal Society of Chemistry journal article supplement (doi:10.1039/d4lc00224e), 2024-01-01
Supplement: d4lc00224e1.pdf [file d4lc00224e1.pdf]

## Supplementary Information

### Electric Field Temporal Interference Stimulation of Neurons *in Vitro*

Annika Ahtiainen<sup>a,1</sup>, Lilly Leydolph<sup>b</sup>, Jarno M.A. Tanskanen<sup>a</sup>, Alexander Hunold<sup>b,c</sup>, Jens Haueisen<sup>b,d</sup>, Jari A.K. Hyttinen<sup>a</sup>

<sup>a</sup>Computational Biophysics and Imaging Group, BioMediTech, Faculty of Medicine and Health Technology, Tampere University, Arvo Ylpön katu 34, 33520 Tampere, Finland

<sup>b</sup>Technische Universität Ilmenau, Institute of Biomedical Engineering and Informatics, 98693, Ilmenau, Germany

<sup>c</sup>neuroConn GmbH, 98693, Ilmenau, Germany

<sup>d</sup>Department of Neurology, Jena University Hospital, 07747 Jena, Germany

<sup>1</sup>Corresponding author: annika.ahtiainen@tuni.fi

#### List of supplementary materials:

- Figures S1-S9
- Tables S1-S4

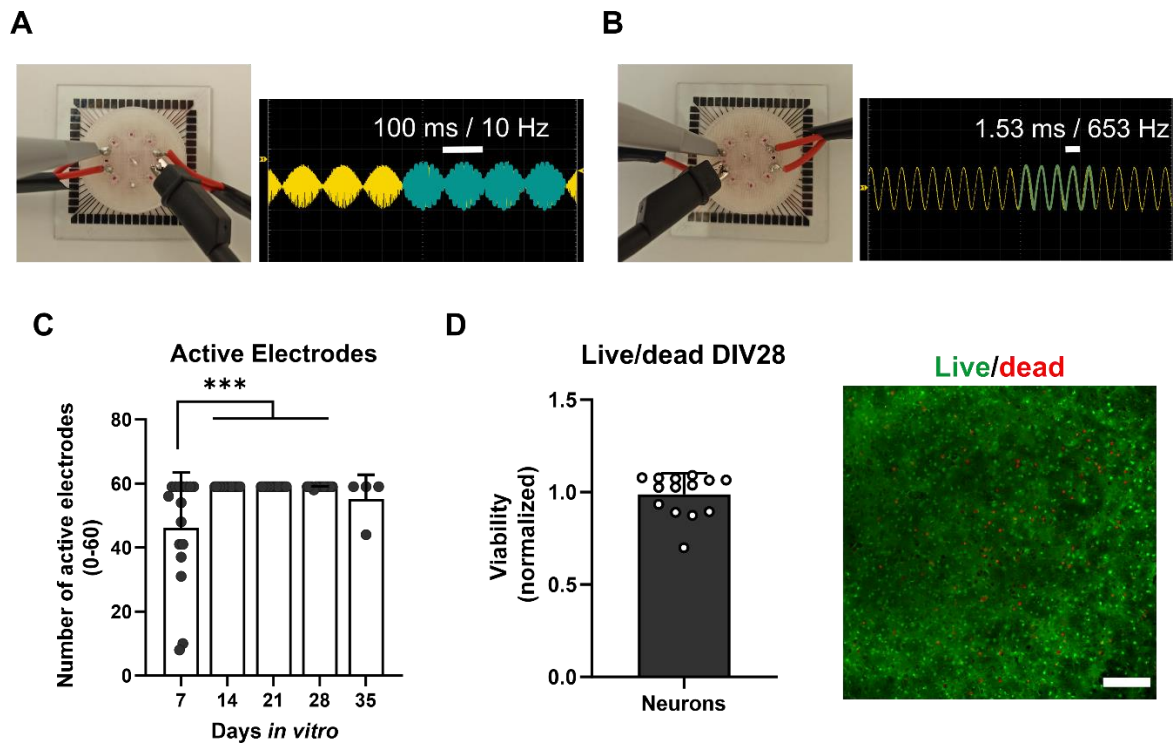

**Supplementary Figure S1.** (A) Oscilloscope measurements of the TIS signal at 500  $\mu$ A. TIS envelopes are indicated in blue. (B) Oscilloscope measurements of high-frequency signals at 500  $\mu$ A. High-frequency signals are indicated in green. (C) The number of electrically active electrodes during maturation. After DIV7, all electrodes were active through the whole culture period, except for one MEA at DIV35 (One-way ANOVA followed by Tukey's multiple comparisons test. Adjusted  $p$ -values are indicated as  $***p < 0.001$  ( $n = 16$  MEAs, except for DIV35  $n = 4$  MEAs)). (D) Live/dead assay of neuronal cultures at DIV28. Bar graph shows means  $\pm$  SD with data points ( $n = 14$  regions of interest [ROIs] in total).

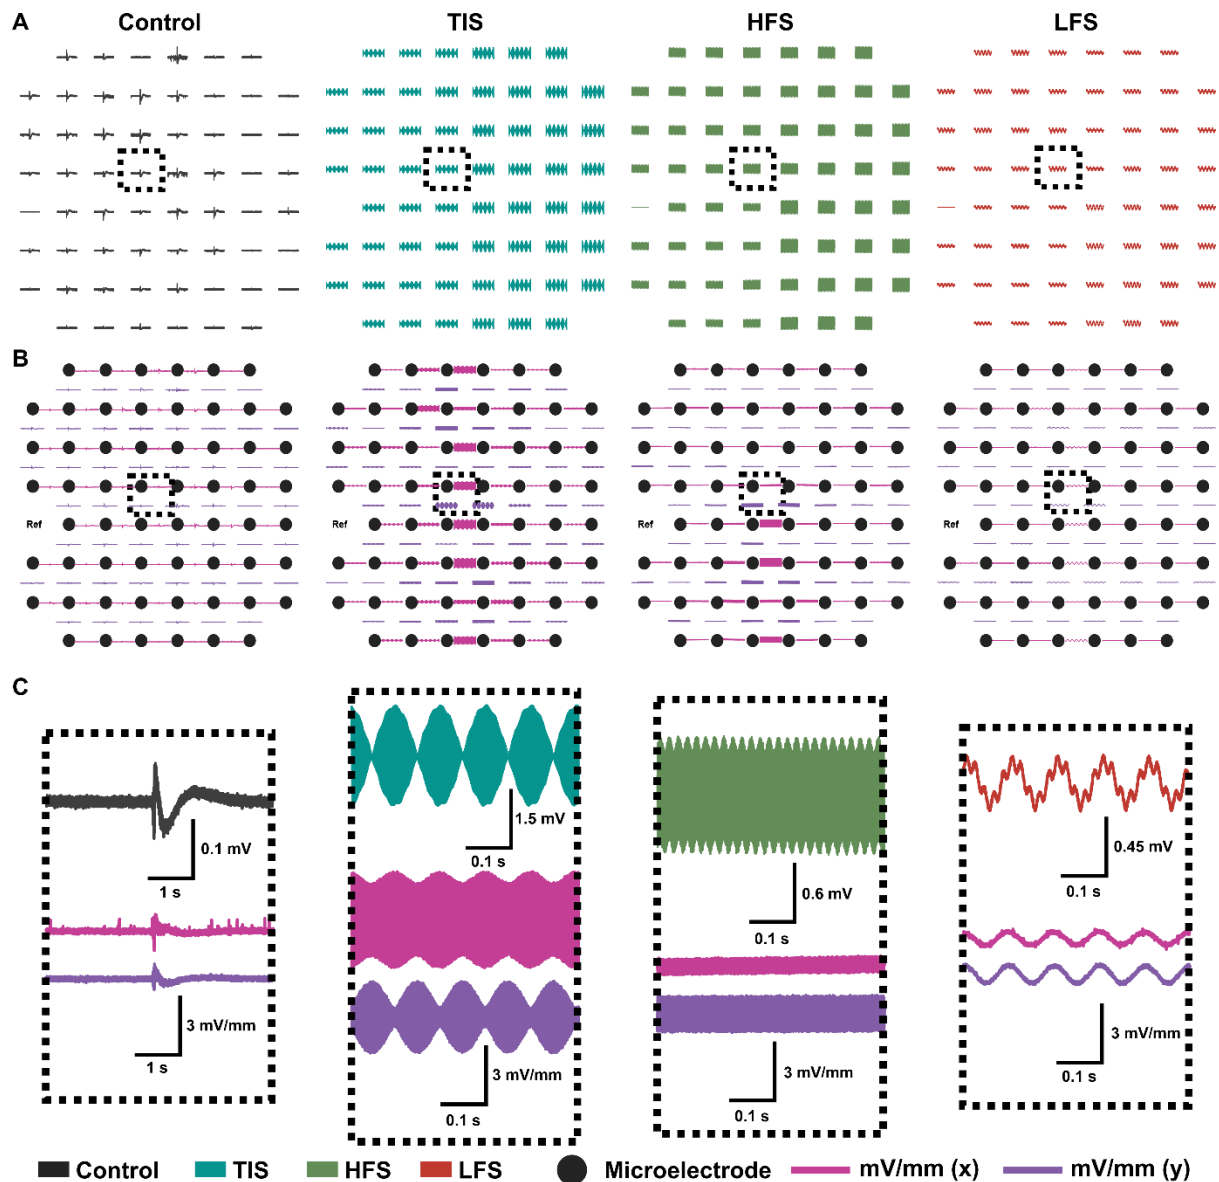

**Supplementary Figure S2.** Electrical stimulation system and its validation. (A) Signal traces of TI, HF, and LF-stimulated cultures (during stimulation) and sham. (B) The electric field potentials (indicated with pink and purple traces) between two adjacent microelectrodes in both horizontal and vertical directions ( $E_x$  [mV/mm] and  $E_y$  [mV/mm], respectively). For TIS, both electric field potentials were lower at the sides of the electrode area and highest in the middle of it, suggesting the steerability of our TIS system. The microelectrodes are depicted as dark gray circles. (C) Close-ups of the signals depicted in A and B from microelectrode ID 44.

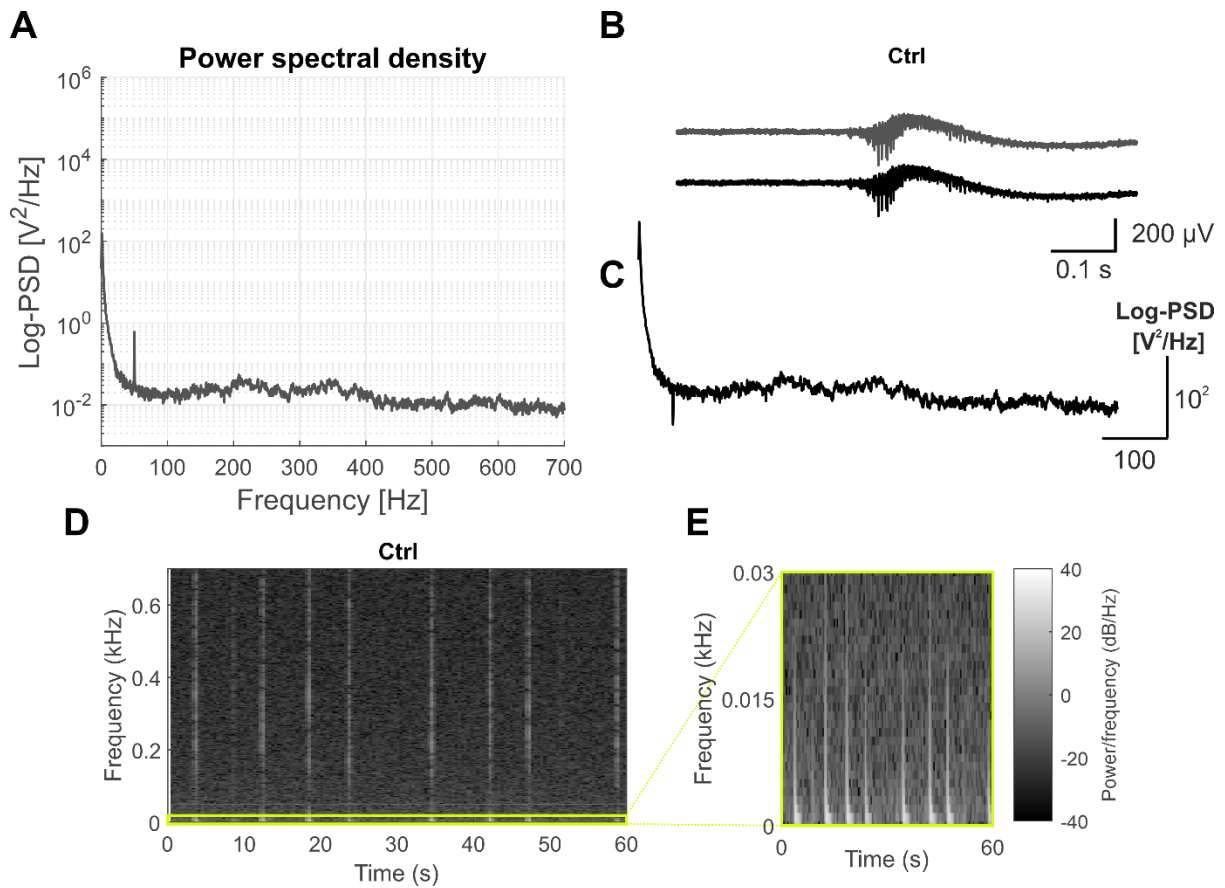

**Supplementary Figure S3.** (A) PSD from unfiltered control data during sham. (B) Unfiltered signals (gray) and filtered signals (black) during sham. Neurons had spiking activity. (C) PSD of filtered signal during sham. (D) Spectrogram of sham signal during 'stimulation'. (E) Close-up of (D). In all cases, the data is derived from one respective electrode that was used to generate all different images.

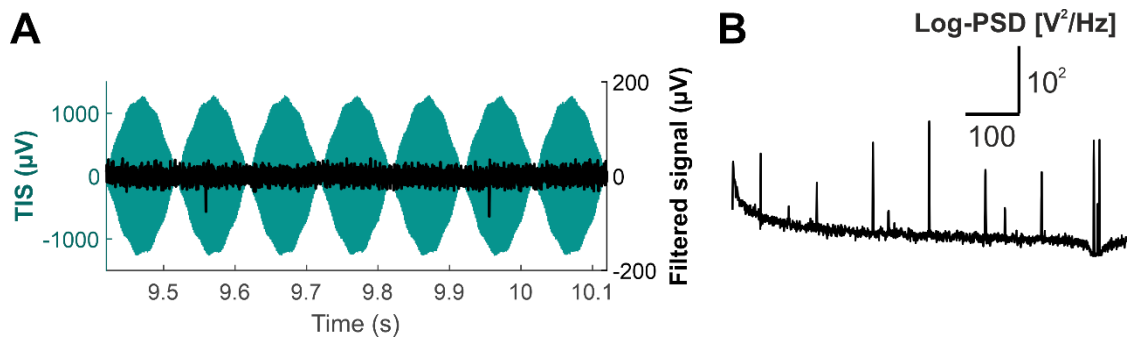

**Supplementary Figure S4.** (A) Unfiltered signals (blue) and filtered signals (black) during TIS. Neurons had some spiking activity also during stimulation. Left y-axis represents the unfiltered signal during stimulation and the right y-axis the filtered signal of the same electrode during stimulation. (B) PSD of the filtered signal during TIS.

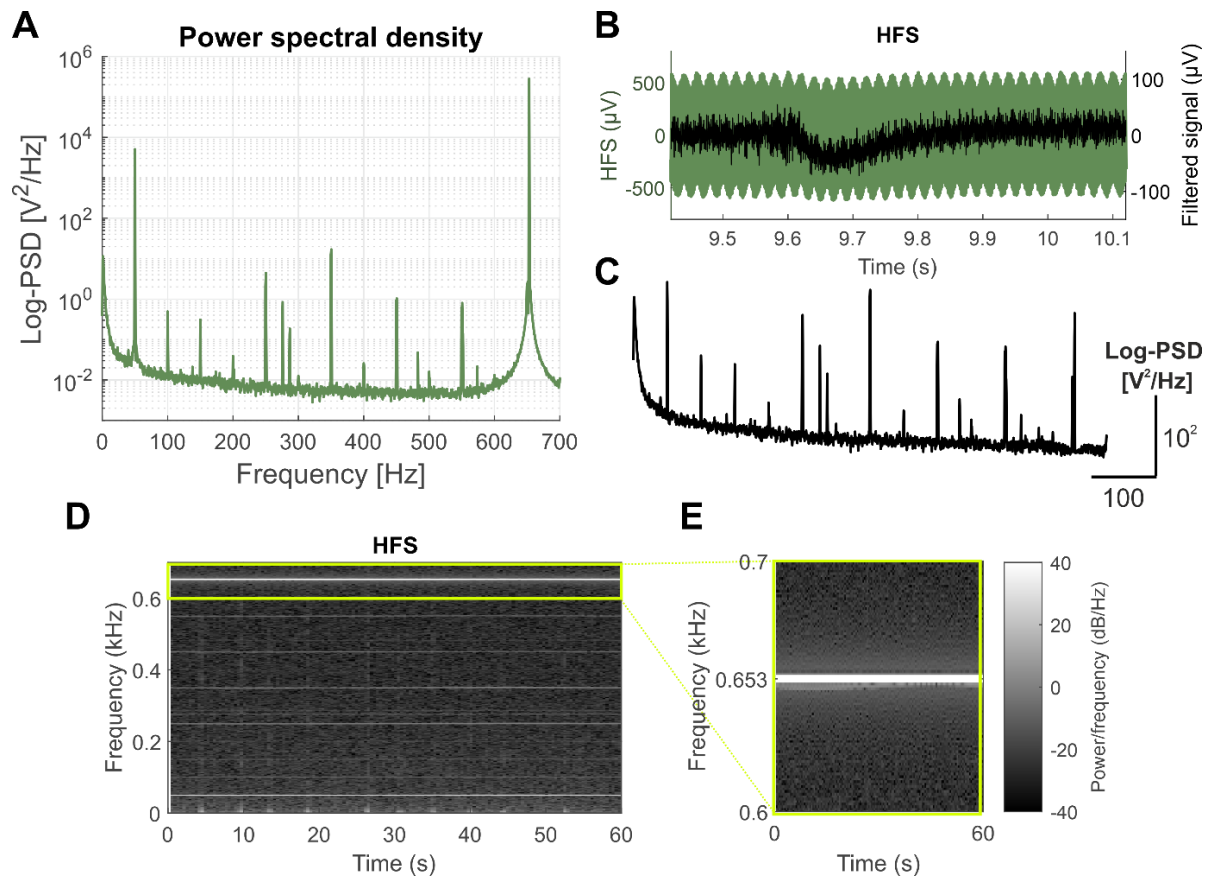

**Supplementary Figure S5.** (A) PSD from unfiltered HFS data during stimulation. (B) Unfiltered signals (green) and filtered signals (black) during HFS. Neurons had spiking activity also during stimulation. Left y-axis represents the unfiltered signal during stimulation and the right y-axis the filtered signal of the same electrode during stimulation. (C) PSD of filtered signal during HFS. (D) Spectrogram of HFS signal during stimulation (E) Close-up of (D). In all cases, the data is derived from one respective electrode that was used to generate all different images.

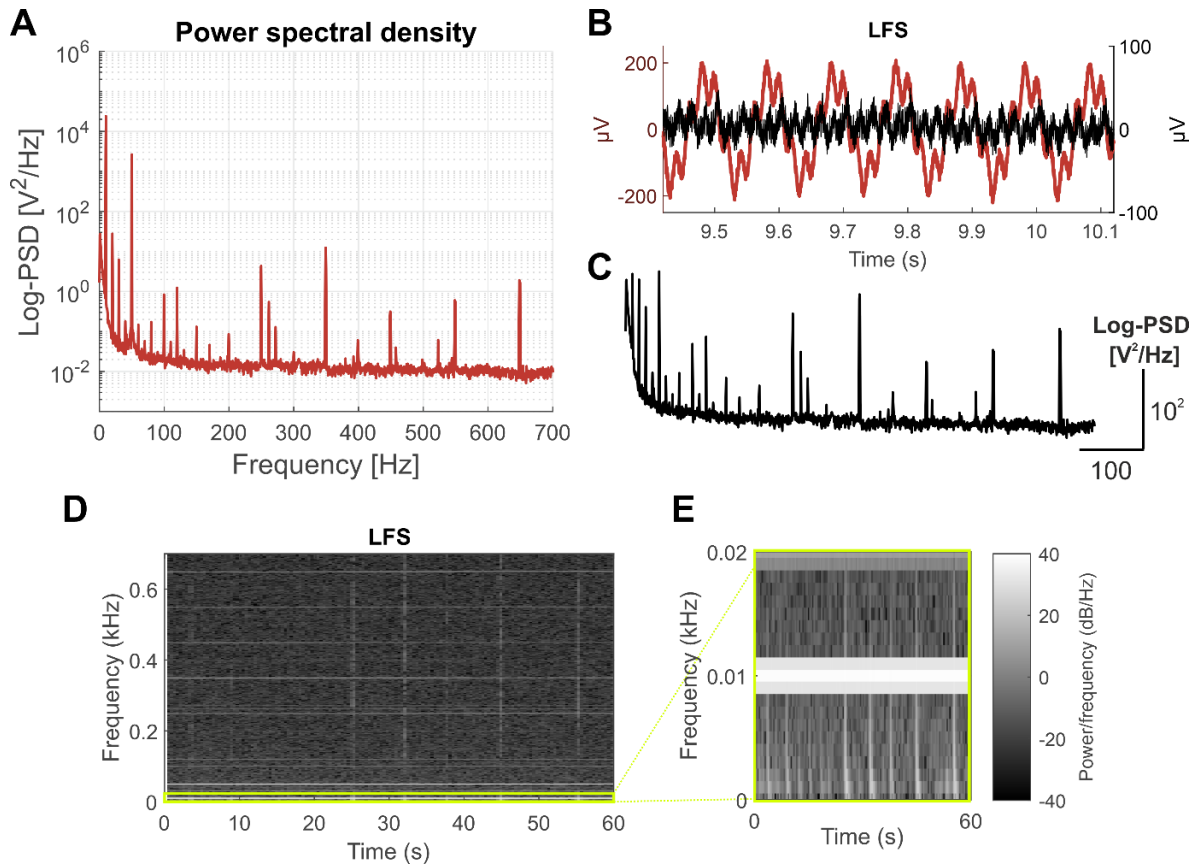

**Supplementary Figure S6.** (A) PSD from unfiltered LFS data during stimulation. (B) Unfiltered signals (orange) and filtered signals (black) during LFS. Neurons had spiking activity also during stimulation. Left y-axis represents the unfiltered signal during stimulation and the right y-axis the filtered signal of the same electrode during stimulation. (C) PSD of filtered signal during LFS. (D) Spectrogram of LFS signal during stimulation (E) Close-up of (D). In all cases, the data is derived from one respective electrode that was used to generate all different images.

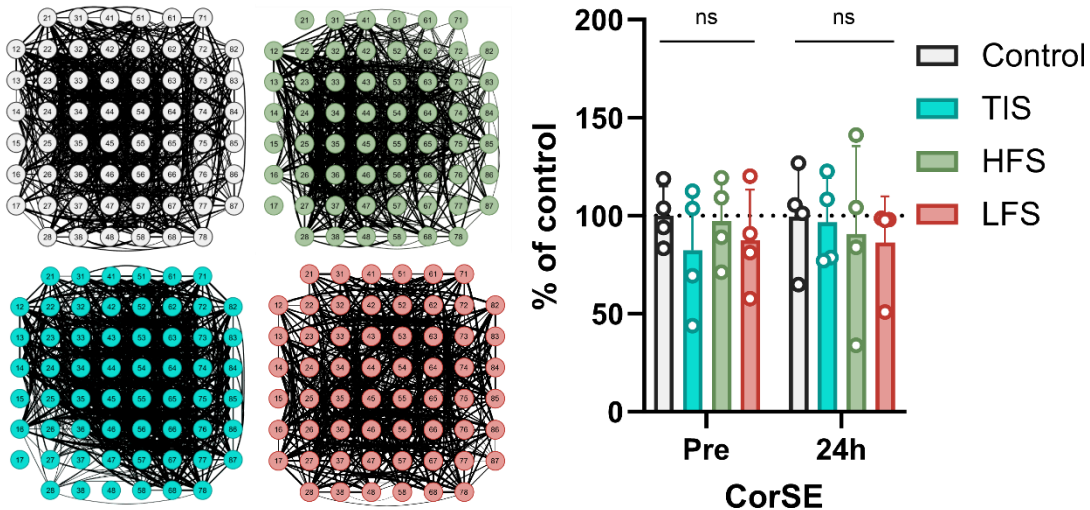

**Supplementary Figure S7.** CorSE analysis 24 hours after the stimulation. There were no differences in the connectivity between the groups. ns=not significant ( $n=4$  MEAs/condition. Mann-Whitney U test was used for the CorSE analysis).

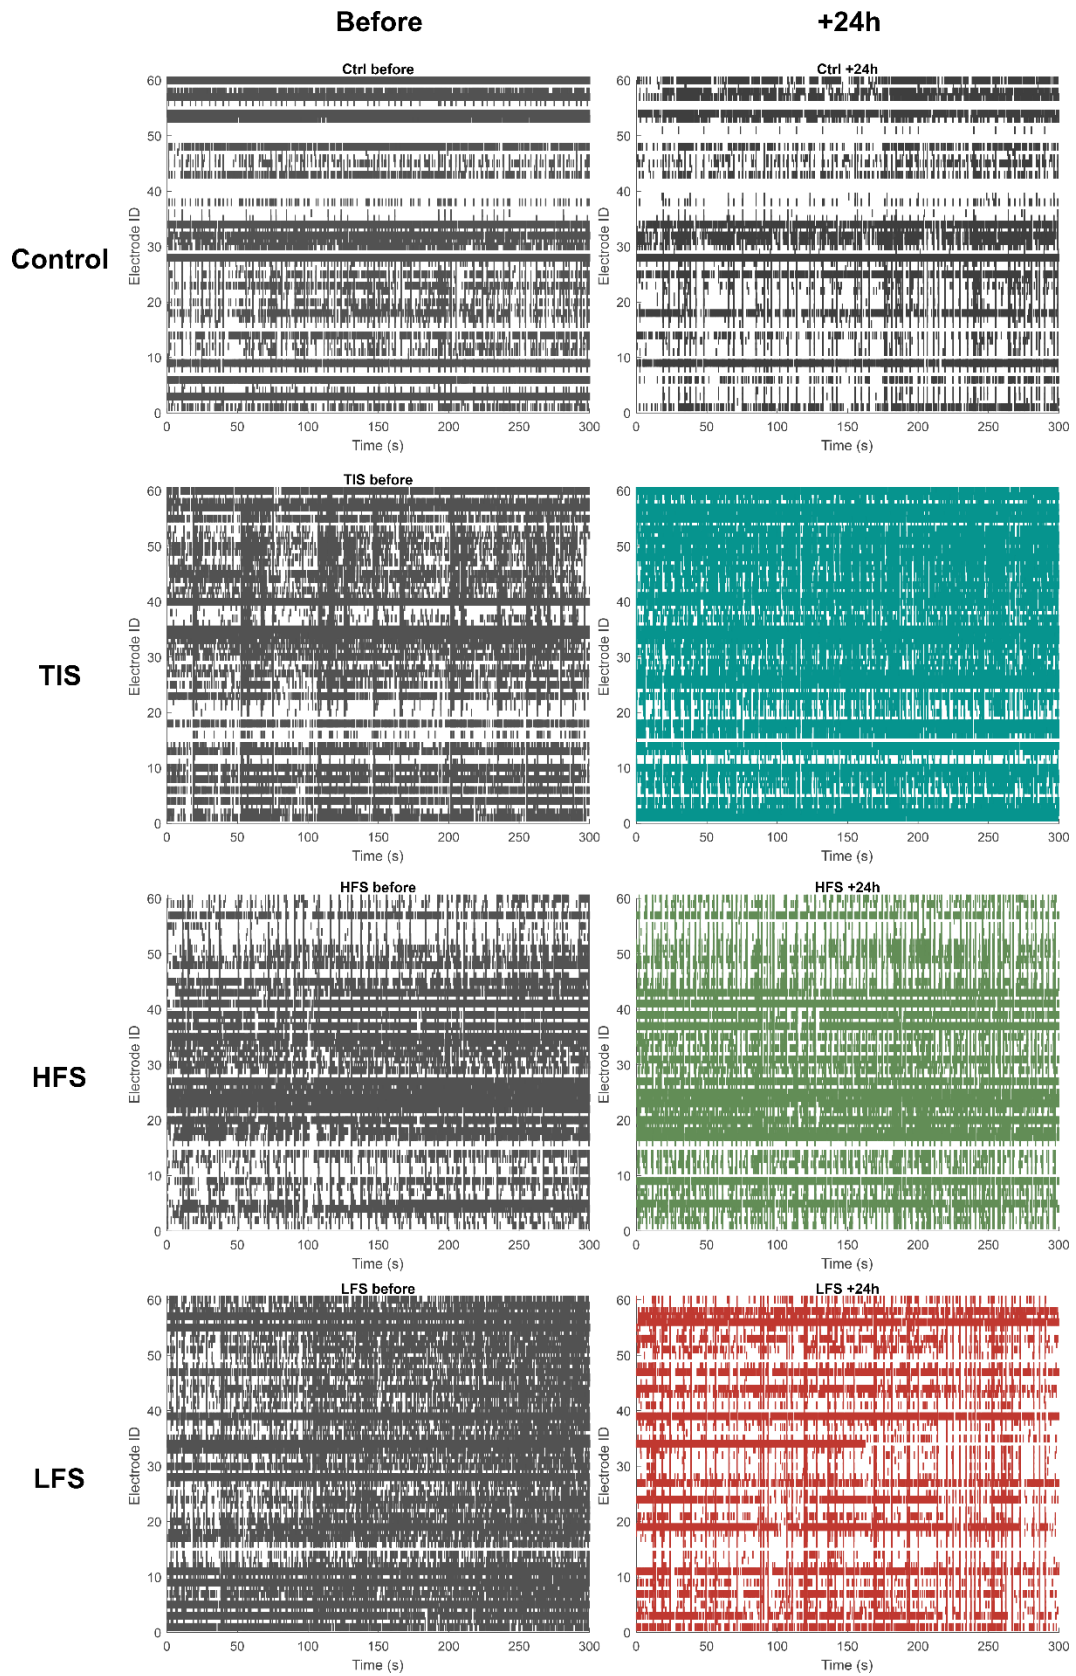

**Supplementary Figure S8.** Representative raster plots of neuron cultures before (left) and 24 hours after stimulation/sham (right).

**A**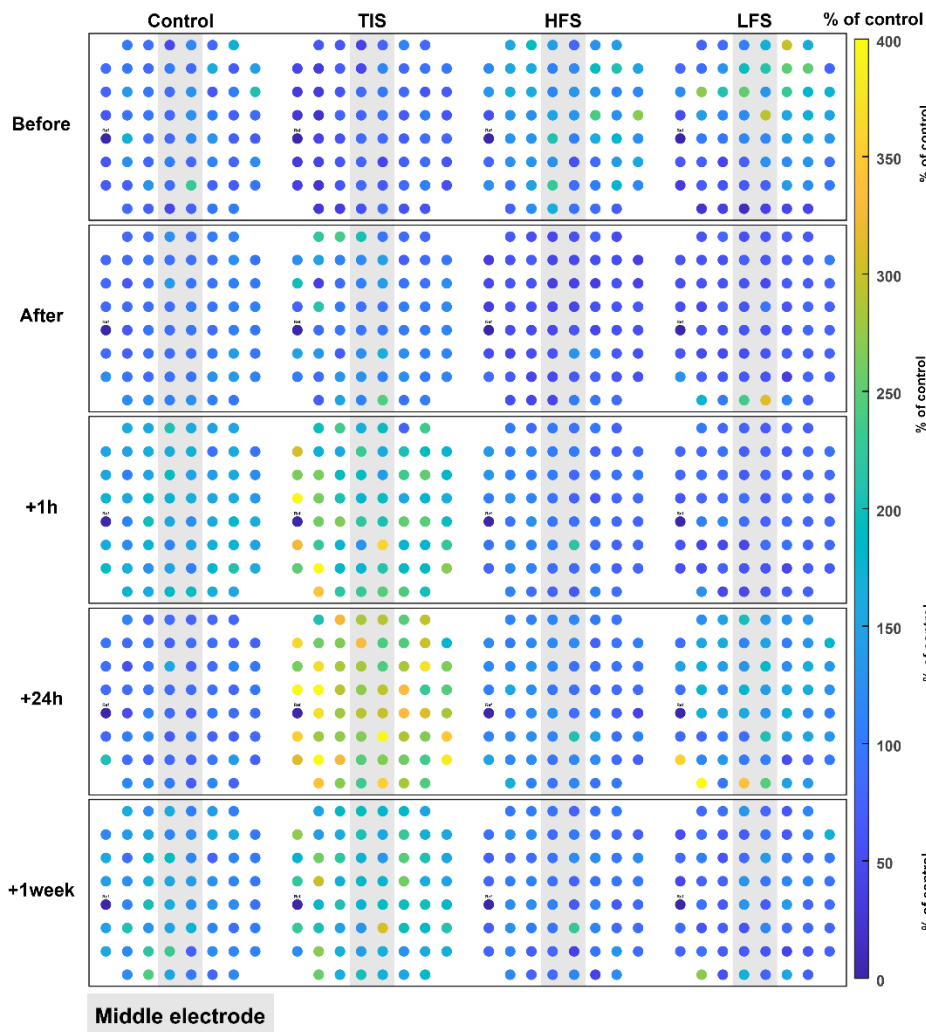**B**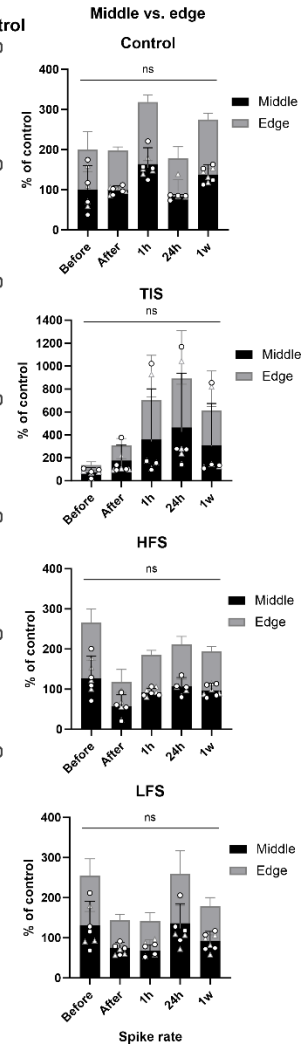

**Supplementary Figure S9.** Percentual changes (compared to control) of the electrodes in the middle and edge of the microelectrode array area. **(A)** The TI-stimulation increased the activity of neurons in the electrodes residing in the middle of the MEA area (indicated with a gray background) as well as on the edge of the electrode area. Reference electrode is indicated with dark blue (0% change). ( $n=16$  electrodes from 4 MEAs for each condition [middle];  $n=43$  electrodes from 4 MEAs for each condition [edge]). **(B)** There were no significant differences between the activated electrode areas for any of the culture conditions (middle: averages of 16 electrodes; edge: averages of 43 electrodes [from  $n=4$  MEAs]; two-way ANOVA followed by Šidák's multiple comparisons test).



**Supplementary Table S1. Maturation of the cultures. Mean±SD shown below, p-values for the maturation above.**

| <b>Electrophysiology – maturation</b>                                                                  |                                    |                                    |                              |                              |                                    |                                    |                                    |
|--------------------------------------------------------------------------------------------------------|------------------------------------|------------------------------------|------------------------------|------------------------------|------------------------------------|------------------------------------|------------------------------------|
| Original one-way ANOVA followed by Tukey's multiple comparisons test for corrections ( $\alpha=0.05$ ) |                                    |                                    |                              |                              |                                    |                                    |                                    |
| Significance ; adjusted p-values<br>ns=not significant; * $p<0.05$ ; ** $p<0.01$ ; *** $p<0.001$       |                                    |                                    |                              |                              |                                    |                                    |                                    |
| Neurons                                                                                                |                                    |                                    |                              |                              |                                    |                                    |                                    |
|                                                                                                        | Spike rate                         | Burst rate                         | Burst duration               | Spikes In Bursts             | Burst Spike Ratio                  | ISI in bursts                      | Active electrodes                  |
| F(df), p                                                                                               | F(4, 63) = 25.90, $p<0.0001$       | F(4, 63) = 12.37, $p<0.0001$       | F(4, 63) = 1.809, $p=0.1383$ | F(4, 63) = 4.757, $p=0.0020$ | F(4, 63) = 61.79, $p<0.0001$       | F(4, 63) = 17.78, $p<0.0001$       | F(4, 63) = 6.703, $p=0.0001$       |
| DIV7 vs. DIV14                                                                                         | <b>0.0020**</b>                    | <b>0.0441*</b>                     | 0.9126 ns                    | 0.0559 ns                    | <b><math>p&lt;0.0001</math>***</b> | <b><math>p&lt;0.0001</math>***</b> | <b>0.0007***</b>                   |
| DIV7 vs. DIV21                                                                                         | <b><math>p&lt;0.0001</math>***</b> | <b>0.0023**</b>                    | 0.2444 ns                    | <b>0.0008***</b>             | <b><math>p&lt;0.0001</math>***</b> | <b><math>p&lt;0.0001</math>***</b> | <b>0.0007***</b>                   |
| DIV7 vs. DIV28                                                                                         | <b><math>p&lt;0.0001</math>***</b> | <b><math>p&lt;0.0001</math>***</b> | 0.2592 ns                    | 0.0547 ns                    | <b><math>p&lt;0.0001</math>***</b> | <b><math>p&lt;0.0001</math>***</b> | <b>0.0008***</b>                   |
| DIV7 vs. DIV35                                                                                         | <b><math>p&lt;0.0001</math>***</b> | <b><math>p&lt;0.0001</math>***</b> | 0.3878 ns                    | 0.9021 ns                    | <b><math>p&lt;0.0001</math>***</b> | <b>0.0007***</b>                   | 0.3312 ns                          |
| DIV14 vs. DIV21                                                                                        | <b>0.0164*</b>                     | 0.8450 ns                          | 0.7397 ns                    | 0.6078 ns                    | <b>0.0004***</b>                   | 0.6082 ns                          | >0.9999 ns                         |
| DIV14 vs. DIV28                                                                                        | <b>0.0004***</b>                   | 0.0536 ns                          | 0.7588 ns                    | >0.9999 ns                   | 0.3297 ns                          | 0.8866 ns                          | >0.9999 ns                         |
| DIV14 vs. DIV35                                                                                        | <b>0.0001***</b>                   | <b>0.0026**</b>                    | 0.7214 ns                    | 0.9087 ns                    | 0.9763 ns                          | 0.9904 ns                          | 0.9344 ns                          |
| DIV21 vs. DIV28                                                                                        | 0.7637 ns                          | 0.4058 ns                          | >0.9999 ns                   | 0.6132 ns                    | 0.1074 ns                          | 0.9861 ns                          | >0.9999 ns                         |
| DIV21 vs. DIV35                                                                                        | 0.0662 ns                          | <b>0.0179*</b>                     | 0.9889 ns                    | 0.3987 ns                    | 0.2000 ns                          | 0.9917 ns                          | 0.9344 ns                          |
| DIV28 vs. DIV35                                                                                        | 0.3031 ns                          | 0.2401 ns                          | 0.9870 ns                    | 0.9068 ns                    | 0.9728 ns                          | >0.9999 ns                         | 0.9381 ns                          |
| <b>Electrophysiology - maturation</b>                                                                  |                                    |                                    |                              |                              |                                    |                                    |                                    |
| Mean ± SD                                                                                              |                                    |                                    |                              |                              |                                    |                                    |                                    |
| Neurons                                                                                                |                                    |                                    |                              |                              |                                    |                                    |                                    |
|                                                                                                        | Spike rate (spikes/min)            | Burst rate (bursts/min)            | Burst duration (ms)          | Spikes In Bursts             | Burst Spike Ratio (0-1)            | ISI in bursts (ms)                 | Active electrodes (0-60 (icl.ref)) |
| DIV7                                                                                                   | 92±75                              | 3±1                                | 184±119                      | 20±22                        | 0.3±0.1                            | 25±16                              | 46±17                              |
| DIV14                                                                                                  | 453±209                            | 12±9                               | 164±43                       | 34±11                        | 0.7±0.1                            | 8±4                                | 59±0                               |
| DIV21                                                                                                  | 751±273                            | 16±6                               | 136±23                       | 41±9                         | 0.8±0.1                            | 4±2                                | 59±0                               |
| DIV28                                                                                                  | 860±371                            | 21±15                              | 137±31                       | 34±11                        | 0.8±0.1                            | 6±2                                | 59±0                               |
| DIV35                                                                                                  | 1144±350                           | 32±13                              | 119±46                       | 27±11                        | 0.7±0.0                            | 6±2                                | 55±8                               |

**Supplementary Table S2. Stimulation results. Mann-Whitney U test, comparisons done by comparing the stimulation results to control change at each time point in question.**

| <b>Electrophysiology – stimulation (%)</b>    |                                    |                                    |                                    |                                    |                                    |
|-----------------------------------------------|------------------------------------|------------------------------------|------------------------------------|------------------------------------|------------------------------------|
| <b>Mann-Whitney-U-test</b>                    |                                    |                                    |                                    |                                    |                                    |
| <b>Significance (median1, median2, U), p)</b> |                                    |                                    |                                    |                                    |                                    |
| <b>* p&lt;0.05</b>                            |                                    |                                    |                                    |                                    |                                    |
| <b>Spike rate</b>                             |                                    |                                    |                                    |                                    |                                    |
| <b>Neurons</b>                                | <b>Pre</b>                         | <b>After</b>                       | <b>1h</b>                          | <b>1d</b>                          | <b>1w</b>                          |
| <b>ctrl vs. TIS</b>                           | (86.48, 77.69, 5), 0.4857          | (96.67, 111.8, 4), 0.3429          | (145.6, 168.8, 6), 0.6857          | (81.75, 263.8, 0), <b>0.0286 *</b> | (141.3, 128.3, 7), 0.8857          |
| <b>ctrl vs. HFS</b>                           | (86.48, 131.3, 4), 0.3429          | (96.67, 61.57, 2), 0.1143          | (145.6, 95.46, 0), <b>0.0286 *</b> | (81.75, 103.0, 3), 0.200           | (141.3, 91.16, 0), <b>0.0286 *</b> |
| <b>ctrl vs. LFS</b>                           | (86.48, 114.3, 4), 0.3429          | (96.67, 71.37, 0), <b>0.0286 *</b> | (145.6, 71.90, 6), <b>0.0286 *</b> | (81.75, 112.3, 6), 0.6857          | (141.3, 86.94, 0), <b>0.0286 *</b> |
| <b>TIS vs. HFS</b>                            | (77.69, 131.3, 0), <b>0.0286 *</b> | (111.8, 61.57, 1), 0.0571          | (168.8, 95.46, 1), 0.0571          | (263.8, 103.0, 0), <b>0.0286 *</b> | (128.3, 91.16, 0), <b>0.0286 *</b> |
| <b>TIS vs. LFS</b>                            | (77.69, 114.3, 2), 0.1143          | (111.8, 71.37, 0), <b>0.0286 *</b> | (168.8, 71.90, 0), <b>0.0286 *</b> | (263.8, 112.3, 1), 0.0571          | (128.3, 86.94, 0), <b>0.0286 *</b> |
| <b>HFS vs. LFS</b>                            | (131.3, 114.3, 7), 0.8857          | (61.57, 71.37, 6), 0.6857          | (95.46, 71.90, 3), 0.200           | (103.0, 112.3, 6), 0.6857          | (91.16, 86.94, 6), 0.6857          |
| <b>Burst rate</b>                             |                                    |                                    |                                    |                                    |                                    |
| <b>Neurons</b>                                |                                    |                                    |                                    |                                    |                                    |
| <b>ctrl vs. TIS</b>                           | (100.5, 73.48, 6), 0.6857          | (117.8, 101.9, 5), 0.4857          | (293.9, 118.5, 5), 0.4857          | (98.49, 326.8, 0), <b>0.0286 *</b> | (226.1, 132.4, 5), 0.4857          |
| <b>ctrl vs. HFS</b>                           | (100.5, 127.7, 4), 0.3429          | (117.8, 48.25, 0), <b>0.0286 *</b> | (293.9, 74.06, 0), <b>0.0286 *</b> | (98.49, 92.85, 6), 0.6857          | (226.1, 90.87, 0), <b>0.0286 *</b> |
| <b>ctrl vs. LFS</b>                           | (100.5, 141.1, 3), 0.2000          | (117.8, 66.45, 0), <b>0.0286 *</b> | (293.9, 52.42, 0), <b>0.0286 *</b> | (98.49, 104.6, 8), >0.9999         | (226.1, 86.79, 0), <b>0.0286 *</b> |
| <b>TIS vs. HFS</b>                            | (73.48, 127.7, 3), 0.2000          | (101.9, 48.25, 1), 0.0571          | (118.5, 74.06, 2), 0.1143          | (326.8, 92.85, 0), <b>0.0286 *</b> | (132.4, 90.87, 1), 0.0571          |
| <b>TIS vs. LFS</b>                            | (73.48, 141.1, 3), 0.2000          | (101.9, 66.45, 1), 0.0571          | (118.5, 52.42, 0), <b>0.0286 *</b> | (326.8, 104.6, 0), <b>0.0286 *</b> | (132.4, 86.79, 0), <b>0.0286 *</b> |
| <b>HFS vs. LFS</b>                            | (127.7, 141.1, 6), 0.6857          | (48.25, 66.45, 7), 0.8857          | (74.06, 52.42, 0), <b>0.0286 *</b> | (92.85, 104.6, 6), 0.6857          | (90.87, 86.79, 7), 0.8857          |
| <b>Burst duration</b>                         |                                    |                                    |                                    |                                    |                                    |
| <b>Neurons</b>                                |                                    |                                    |                                    |                                    |                                    |
| <b>ctrl vs. TIS</b>                           | (104.2, 95.54, 4), 0.3429          | (81.93, 101.0, 5), 0.4857          | (54.09, 191.6, 1), 0.0571          | (88.93, 83.21, 7), 0.8857          | (91.05, 94.74, 5), 0.4857          |
| <b>ctrl vs. HFS</b>                           | (104.2, 99.34, 7), 0.8857          | (81.93, 102.7, 5), 0.4857          | (54.09, 168.6, 0), <b>0.0286 *</b> | (88.93, 103.3, 5), 0.4857          | (91.05, 114.8, 3), 0.2000          |
| <b>ctrl vs. LFS</b>                           | (104.2, 81.31, 3), 0.2000          | (81.93, 151.3, 0), <b>0.0286 *</b> | (54.09, 165.9, 0), <b>0.0286 *</b> | (88.93, 146.9, 2), 0.1143          | (91.05, 146.2, 0), <b>0.0286 *</b> |
| <b>TIS vs. HFS</b>                            | (95.54, 99.34, 7), 0.8857          | (101.0, 102.7, 8), >0.9999         | (191.6, 168.6, 6), 0.6857          | (83.21, 103.3, 5), 0.4857          | (94.74, 114.8, 6), 0.6857          |
| <b>TIS vs. LFS</b>                            | (95.54, 81.31, 5), 0.4857          | (101.0, 151.3, 2), 0.1143          | (191.6, 165.9, 8), >0.9999         | (83.21, 146.9, 2), 0.1143          | (94.74, 146.2, 3), 0.2000          |
| <b>HFS vs. LFS</b>                            | (99.34, 81.31, 3), 0.2000          | (102.7, 151.3, 2), 0.1143          | (168.6, 165.9, 6), 0.6857          | (103.3, 146.9, 2), 0.1143          | (114.8, 146.2, 6), 0.6857          |
| <b>Spikes in Burst</b>                        |                                    |                                    |                                    |                                    |                                    |
| <b>Neurons</b>                                |                                    |                                    |                                    |                                    |                                    |
| <b>ctrl vs. TIS</b>                           | (94.57, 96.83, 7), 0.8857          | (82.07, 90.65, 5), 0.4857          | (48.97, 144.3, 0), <b>0.0286 *</b> | (89.00, 84.21, 6), 0.6857          | (70.37, 91.48, 0), <b>0.0286 *</b> |
| <b>ctrl vs. HFS</b>                           | (94.57, 85.90, 6), 0.6857          | (82.07, 96.25, 6), 0.6857          | (48.97, 131.2, 1), 0.0571          | (89.00, 101.8, 5), 0.4857          | (70.37, 90.97, 1), 0.0571          |
| <b>ctrl vs. LFS</b>                           | (94.57, 64.10, 3), 0.2000          | (82.07, 116.0, 0), <b>0.0286 *</b> | (48.97, 144.9, 0), <b>0.0286 *</b> | (89.00, 113.2, 1), 0.0571          | (70.37, 114.7, 0), <b>0.0286 *</b> |
| <b>TIS vs. HFS</b>                            | (96.83, 85.90, 8), >0.9999         | (90.65, 96.25, 7), 0.8857          | (144.3, 131.2, 6), 0.6857          | (84.21, 101.8, 4), 0.3429          | (91.48, 90.97, 7), 0.8857          |
| <b>TIS vs. LFS</b>                            | (96.83, 64.10, 3), 0.2000          | (90.65, 116.0, 3), 0.2000          | (144.3, 144.9, 7), 0.8857          | (84.21, 113.2, 1), 0.0571          | (91.48, 114.7, 3), 0.2000          |
| <b>HFS vs. LFS</b>                            | (85.90, 64.10, 4), 0.3429          | (90.65, 116.0, 4), 0.3429          | (144.9, 131.2, 5), 0.4857          | (101.8, 113.2, 4), 0.3429          | (90.97, 114.7, 5), 0.4857          |

| Burst Spike Ratio |                                    |                                    |                                    |                            |                                    |
|-------------------|------------------------------------|------------------------------------|------------------------------------|----------------------------|------------------------------------|
| Neurons           |                                    |                                    |                                    |                            |                                    |
| ctrl vs. TIS      | (99.30, 85.89, 4), 0.3429          | (100.7, 94.29, 6), 0.6857          | (90.77, 112.3, 0), <b>0.0286 *</b> | (97.26, 108.6, 2), 0.1143  | (89.23, 147.2, 0), <b>0.0286 *</b> |
| ctrl vs. HFS      | (99.30, 91.94, 0), <b>0.0286 *</b> | (100.7, 91.20, 0), <b>0.0286 *</b> | (90.77, 109.0, 0), <b>0.0286 *</b> | (97.26, 99.78, 6), 0.6857  | (89.23, 121.3, 0), <b>0.0286 *</b> |
| ctrl vs. LFS      | (99.30, 90.29, 4), 0.3429          | (100.7, 94.92, 4), 0.3429          | (90.77, 103.9, 0), <b>0.0286 *</b> | (97.26, 99.48, 6), 0.6857  | (89.23, 132.3, 0), <b>0.0286 *</b> |
| TIS vs. HFS       | (85.89, 91.94, 4), 0.3429          | (94.29, 91.20, 6), 0.6857          | (112.3, 109.0, 6), 0.6857          | (108.6, 99.78, 4), 0.3429  | (147.2, 121.3, 2), 0.1143          |
| TIS vs. LFS       | (85.89, 90.29, 7), 0.8857          | (94.29, 94.92, 6), 0.6857          | (112.3, 103.9, 7), 0.8857          | (108.6, 99.48, 5), 0.4857  | (147.2, 132.3, 5), 0.4857          |
| HFS vs. LFS       | (91.94, 90.29, 6), 0.6857          | (91.20, 94.92, 4), 0.3429          | (109.0, 103.9, 7), 0.8857          | (99.78, 99.48, 8), >0.9999 | (121.3, 132.3, 4), 0.3429          |
| ISI in bursts     |                                    |                                    |                                    |                            |                                    |
| Neurons           |                                    |                                    |                                    |                            |                                    |
| ctrl vs. TIS      | (97.50, 115.9, 4), 0.3429          | (94.10, 116.1, 2), 0.1143          | (123.5, 124.1, 8), >0.9999         | (97.95, 113.6, 6), 0.6857  | (142.4, 101.6, 4), 0.3429          |
| ctrl vs. HFS      | (97.50, 130.1, 4), 0.3429          | (94.10, 109.1, 3), 0.2000          | (123.5, 133.3, 6), 0.6857          | (97.95, 99.20, 7), 0.8857  | (142.4, 127.8, 5), 0.4857          |
| ctrl vs. LFS      | (97.50, 109.4, 7), 0.8857          | (94.10, 121.7, 0), <b>0.0286 *</b> | (123.5, 118.6, 8), >0.9999         | (97.95, 127.8, 2), 0.1143  | (142.4, 126.6, 7), 0.8857          |
| TIS vs. HFS       | (115.9, 130.1, 5), 0.4857          | (116.1, 109.1, 8), >0.9999         | (124.1, 133.3, 6), 0.6857          | (113.6, 99.20, 8), >0.9999 | (101.6, 127.8, 3), 0.2000          |
| TIS vs. LFS       | (115.9, 109.4, 7), 0.8857          | (116.1, 121.7, 4), 0.3429          | (124.1, 118.6, 8), >0.9999         | (113.6, 127.8, 5), 0.4857  | (101.6, 126.6, 4), 0.3429          |
| HFS vs. LFS       | (130.1, 109.4, 7), 0.8857          | (109.1, 121.7, 5), 0.4857          | (133.3, 118.6, 7), 0.8857          | (99.20, 127.8, 2), 0.1143  | (127.8, 126.6, 8), >0.9999         |
| CorSE             |                                    |                                    |                                    |                            |                                    |
| Neurons           |                                    |                                    |                                    |                            |                                    |
| ctrl vs. TIS      | (98.90, 86.49, 5), 0.4857          |                                    |                                    | (103.3, 93.53, 8), >0.9999 |                                    |
| ctrl vs. HFS      | (98.90, 99.13, 8), >0.9999         |                                    |                                    | (103.3, 94.04, 7), 0.8857  |                                    |
| ctrl vs. LFS      | (98.90, 86.04, 5), 0.4857          |                                    |                                    | (103.3, 97.79, 3), 0.2000  |                                    |
| TIS vs. HFS       | (86.49, 99.13, 5), 0.4857          |                                    |                                    | (93.53, 94.04, 8), >0.9999 |                                    |
| TIS vs. LFS       | (86.49, 86.04, 7), 0.8857          |                                    |                                    | (93.53, 97.79, 6), 0.6857  |                                    |
| HFS vs. LFS       | (99.13, 86.04, 7), 0.8857          |                                    |                                    | (94.04, 97.79, 7), 0.8857  |                                    |

**Supplementary Table S3.** Absolute values (mean±SD, standard error of mean [SEM]) of the electrical stimulation results.

| Electrophysiology - stimulation |                    |                    |                    |                    |                    |
|---------------------------------|--------------------|--------------------|--------------------|--------------------|--------------------|
| Mean ±SD, SEM                   |                    |                    |                    |                    |                    |
| Spike rate (spikes/min)         |                    |                    |                    |                    |                    |
|                                 | Pre                | After              | 1h                 | 1d                 | 1w                 |
| Control                         | 809.2±376.2, 188.1 | 777.5±351.2, 175.6 | 1215±476.6, 238.3  | 713.6±290.7, 145.3 | 1144±349.9, 174.9  |
| TIS                             | 531.6±249.8, 124.9 | 608.9±169.1, 84.53 | 1682±579.2, 289.6  | 1353±330.9, 165.5  | 1295±361.2, 180.6  |
| HFS                             | 1086±320.2, 160.1  | 588.3±234.8, 117.4 | 1568±590, 295      | 1016±327.9, 164    | 1418±427.3, 213.7  |
| LFS                             | 1012±370, 185      | 675.6±190.8, 95.41 | 1183±698.5, 349.3  | 1255±1021, 510.7   | 1258±714.4, 357.2  |
| Burst rate (bursts/min)         |                    |                    |                    |                    |                    |
| Control                         | 15.41±5.075, 2.537 | 19.31±6.595, 3.298 | 41.57±16.74, 8.369 | 15.58±3.517, 1.759 | 32.47±12.91, 6.456 |

|            |                       |                       |                       |                       |                       |
|------------|-----------------------|-----------------------|-----------------------|-----------------------|-----------------------|
| <b>TIS</b> | 14.42±12.21,<br>6.105 | 19.27±7.762,<br>3.881 | 51.92±21.46,<br>10.73 | 44.65±17.55,<br>8.774 | 47.59±19.84,<br>9.919 |
| <b>HFS</b> | 25.70±15.76,<br>7.880 | 14.08±5.515,<br>2.758 | 54.36±29.38,<br>14.69 | 26.92±12.35,<br>6.176 | 45.33±18.52,<br>9.260 |
| <b>LFS</b> | 30.21±21.03,<br>10.51 | 18.88±4.970,<br>2.485 | 46.73±40.24,<br>20.12 | 43.42±49.41,<br>24.71 | 53.68±41.30,<br>20.65 |

#### Burst duration (ms)

|                |                       |                       |                       |                       |                       |
|----------------|-----------------------|-----------------------|-----------------------|-----------------------|-----------------------|
| <b>Control</b> | 150.2±30.21,<br>15.10 | 108.7±34.10,<br>17.05 | 89.43±23.85,<br>11.92 | 123.2±42.90,<br>21.45 | 118.7±45.68,<br>22.84 |
| <b>TIS</b>     | 134.1±30.55,<br>15.28 | 95.15±29.53,<br>14.77 | 134.2±45.43,<br>22.72 | 96.75±24.97,<br>12.49 | 110.7±10.46,<br>5.230 |
| <b>HFS</b>     | 149.2±21.90,<br>10.95 | 109.7±27.05,<br>13.52 | 139.8±18.22,<br>9.112 | 125.9±25.19,<br>12.59 | 147.9±40.38,<br>20.19 |
| <b>LFS</b>     | 114.7±36.42,<br>18.21 | 121.9±43.48,<br>21.74 | 123.2±19.95,<br>9.973 | 138.3±53.95,<br>26.98 | 130.3±47.69,<br>23.85 |

#### Spikes in Burst

|                |                       |                       |                       |                       |                       |
|----------------|-----------------------|-----------------------|-----------------------|-----------------------|-----------------------|
| <b>Control</b> | 40.06±12.33,<br>6.163 | 31.12±7.804,<br>3.902 | 21.61±4.831,<br>2.415 | 34.59±11.95,<br>5.976 | 27.39±10.95,<br>5.474 |
| <b>TIS</b>     | 35.05±10.96,<br>5.482 | 24.61±6.907,<br>3.454 | 25.88±7.607,<br>3.803 | 24.23±7.066,<br>3.533 | 22.52±8.025,<br>4.012 |
| <b>HFS</b>     | 35.48±12.75,<br>6.377 | 24.57±8.971,<br>4.485 | 21.99±2.633,<br>1.317 | 29.08±7.983,<br>3.992 | 21.68±3.667,<br>1.833 |
| <b>LFS</b>     | 26.27±7.814,<br>3.907 | 24.92±5.921,<br>2.961 | 20.63±3.961,<br>1.980 | 25.59±5.090,<br>2.545 | 19.27±5.111,<br>2.556 |

#### Burst Spike Ratio (0-1)

|                |                          |                          |                          |                          |                          |
|----------------|--------------------------|--------------------------|--------------------------|--------------------------|--------------------------|
| <b>Control</b> | 0.8171±0.0303,<br>0.0151 | 0.8254±0.0357,<br>0.0179 | 0.7431±0.0251,<br>0.0126 | 0.7957±0.0236,<br>0.0118 | 0.7248±0.0332,<br>0.0169 |
| <b>TIS</b>     | 0.7339±0.0979,<br>0.0489 | 0.7043±0.0710,<br>0.0355 | 0.7304±0.0322,<br>0.0161 | 0.7687±0.0541,<br>0.0271 | 0.7290±0.1115,<br>0.0557 |
| <b>HFS</b>     | 0.7519±0.0194,<br>0.0097 | 0.6129±0.1737,<br>0.0868 | 0.7279±0.0570,<br>0.0285 | 0.7374±0.0678,<br>0.0339 | 0.6299±0.0487,<br>0.0243 |
| <b>LFS</b>     | 0.7314±0.117,<br>0.0585  | 0.7532±0.0858,<br>0.0429 | 0.7252±0.0484,<br>0.0242 | 0.7573±0.0985,<br>0.0492 | 0.6937±0.1121,<br>0.0561 |

#### ISI in bursts (ms)

|                |                        |                        |                        |                         |                        |
|----------------|------------------------|------------------------|------------------------|-------------------------|------------------------|
| <b>Control</b> | 4.741±0.4361,<br>0.218 | 4.333±1.218,<br>0.6088 | 5.778±1.091,<br>0.5454 | 4.626±0.8505,<br>0.4253 | 6.323±1.713,<br>0.8565 |
| <b>TIS</b>     | 5.689±1.448,<br>0.7239 | 5.888±1.805,<br>0.9026 | 8.592±3.219,<br>1.610  | 6.371±3.553,<br>1.777   | 8.307±4.258,<br>2.129  |
| <b>HFS</b>     | 6.399±2.037,<br>1.018  | 6.905±2.175,<br>1.087  | 9.996±1.549,<br>0.7743 | 6.409±1.603,<br>0.8016  | 10.73±3.064,<br>1.532  |
| <b>LFS</b>     | 6.284±2.990,<br>1.495  | 7.097±2.610,<br>1.305  | 9.351±3.276,<br>1.638  | 8.224±5.239,<br>2.619   | 10.30±4.370,<br>2.185  |

#### CorSE (0-1)

|                |                 |  |                 |  |
|----------------|-----------------|--|-----------------|--|
| <b>Control</b> | 0.68±0.10, 0.05 |  | 0.67±0.18, 0.09 |  |
| <b>TIS</b>     | 0.56±0.22, 0.11 |  | 0.52±0.19, 0.10 |  |
| <b>HFS</b>     | 0.66±0.15, 0.07 |  | 0.62±0.31, 0.16 |  |
| <b>LFS</b>     | 0.60±0.18, 0.09 |  | 0.54±0.25, 0.12 |  |

**Supplementary Table S4. Other results (viability and CorSE).**

| <b>Other results</b>                                                                                          |                                              |                                                                      |                     |
|---------------------------------------------------------------------------------------------------------------|----------------------------------------------|----------------------------------------------------------------------|---------------------|
| <b>Mann-Whitney-U-test</b>                                                                                    |                                              |                                                                      |                     |
| <b>Mean±SD</b>                                                                                                |                                              |                                                                      |                     |
|                                                                                                               | <b>Viability DIV28</b>                       | <b>CorSE DIV28</b>                                                   |                     |
| <b>Neurons</b>                                                                                                | 83±10                                        | 0.62±0.16                                                            |                     |
| <b>Impact electrodes ('middle' vs. 'edge')</b>                                                                |                                              |                                                                      |                     |
| <b>Two-way ANOVA followed by Šidák's multiple comparisons test for corrections (<math>\alpha=0.05</math>)</b> |                                              |                                                                      |                     |
| <b>Significance ; adjusted <math>p</math>-values</b>                                                          |                                              |                                                                      |                     |
| <b>ns=not significant; * <math>p&lt;0.05</math>; ** <math>p&lt;0.01</math>; *** <math>p&lt;0.001</math></b>   |                                              |                                                                      |                     |
|                                                                                                               | <b>F(df), <math>p</math> (column factor)</b> | <b>Middle vs. edge (<math>p</math>) (before, after, 1h, 24h, 1w)</b> | <b>Significance</b> |
| <b>Control</b>                                                                                                | F (1, 30) = 0.001216, $p=0.9724$             | >0.9999, >0.9999, 0.9963, 0.9795, >0.9999                            | ns                  |
| <b>TIS</b>                                                                                                    | F (1, 30) = 0.05899, $p=0.8098$              | >0.9999, >0.9999, >0.9999, >0.9999, >0.9999,                         | ns                  |
| <b>HFS</b>                                                                                                    | F (1, 30) = 0.1368, $p=0.7141$               | 0.9867, 0.9998, >0.9999, >0.9999, >0.9999                            | ns                  |
| <b>LFS</b>                                                                                                    | F (1, 30) = 0.2480, $p=0.6221$               | 0.9994, 0.9996, 0.9999, 0.9907, 0.9997                               | ns                  |
